# Supplementary material for: Self-healing, stretchable and recyclable polyurethane-PEDOT:PSS conductive blends
Source: Royal Society of Chemistry journal article supplement (doi:10.1039/d4mh00203b), 2024-01-01
Supplement: d4mh00203b4.pdf [file d4mh00203b4.pdf]

## **Self-healing, stretchable and recyclable polyurethane-PEDOT:PSS conductive blends**

Jinsil Kim, Jiaxin Fan, Gayaneh Petrossian, Xin Zhou, Pierre Kateb, Noemy Gagnon-Lafrenais and  
Fabio Cicoira\*

Department of Chemical Engineering, Polytechnique Montréal, Montréal, QC H3C 3A7, Canada

\*Corresponding author. E-mail: [fabio.cicoira@polymtl.ca](mailto:fabio.cicoira@polymtl.ca)

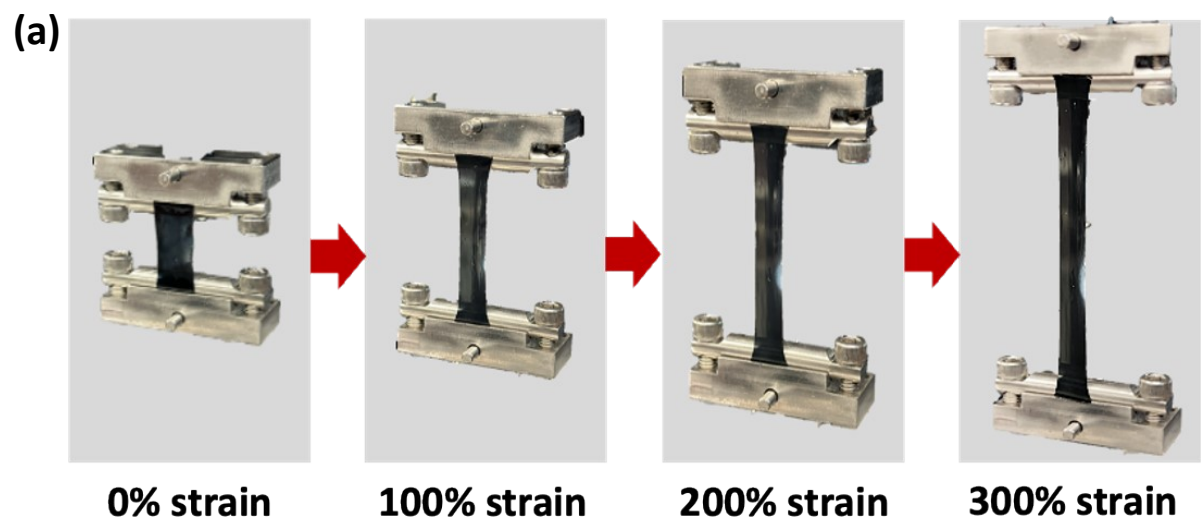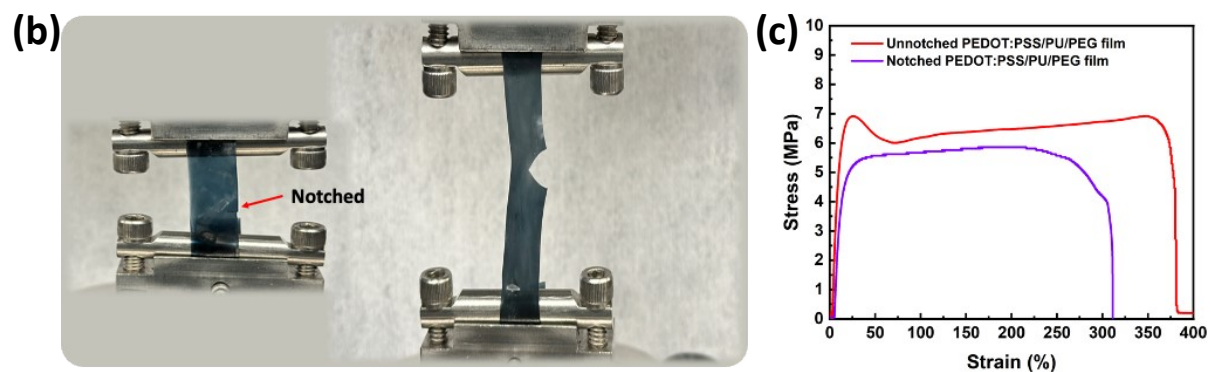

| (d) | Samples                         | Toughness (MJ/m <sup>3</sup> ) |
|-----|---------------------------------|--------------------------------|
|     | Unnotched PEDOT:PSS/PU/PEG film | 24.60 ± 0.23                   |
|     | Notched PEDOT:PSS/PU/PEG film   | 16.54 ± 1.24                   |

**Figure S1.** Photographs of a (a) PEDOT:PSS/PU/PEG film, (b) notched PEDOT:PSS/PU/PEG film under uniaxial strain and (c) tensile stress-strain curves of the unnotched and notched PEDOT:PSS/PU/PEG films. (d) Toughness of unnotched and notched PEDOT:PSS/PU/PEG film. All data (n = 3) are reported as the mean ± standard deviation.

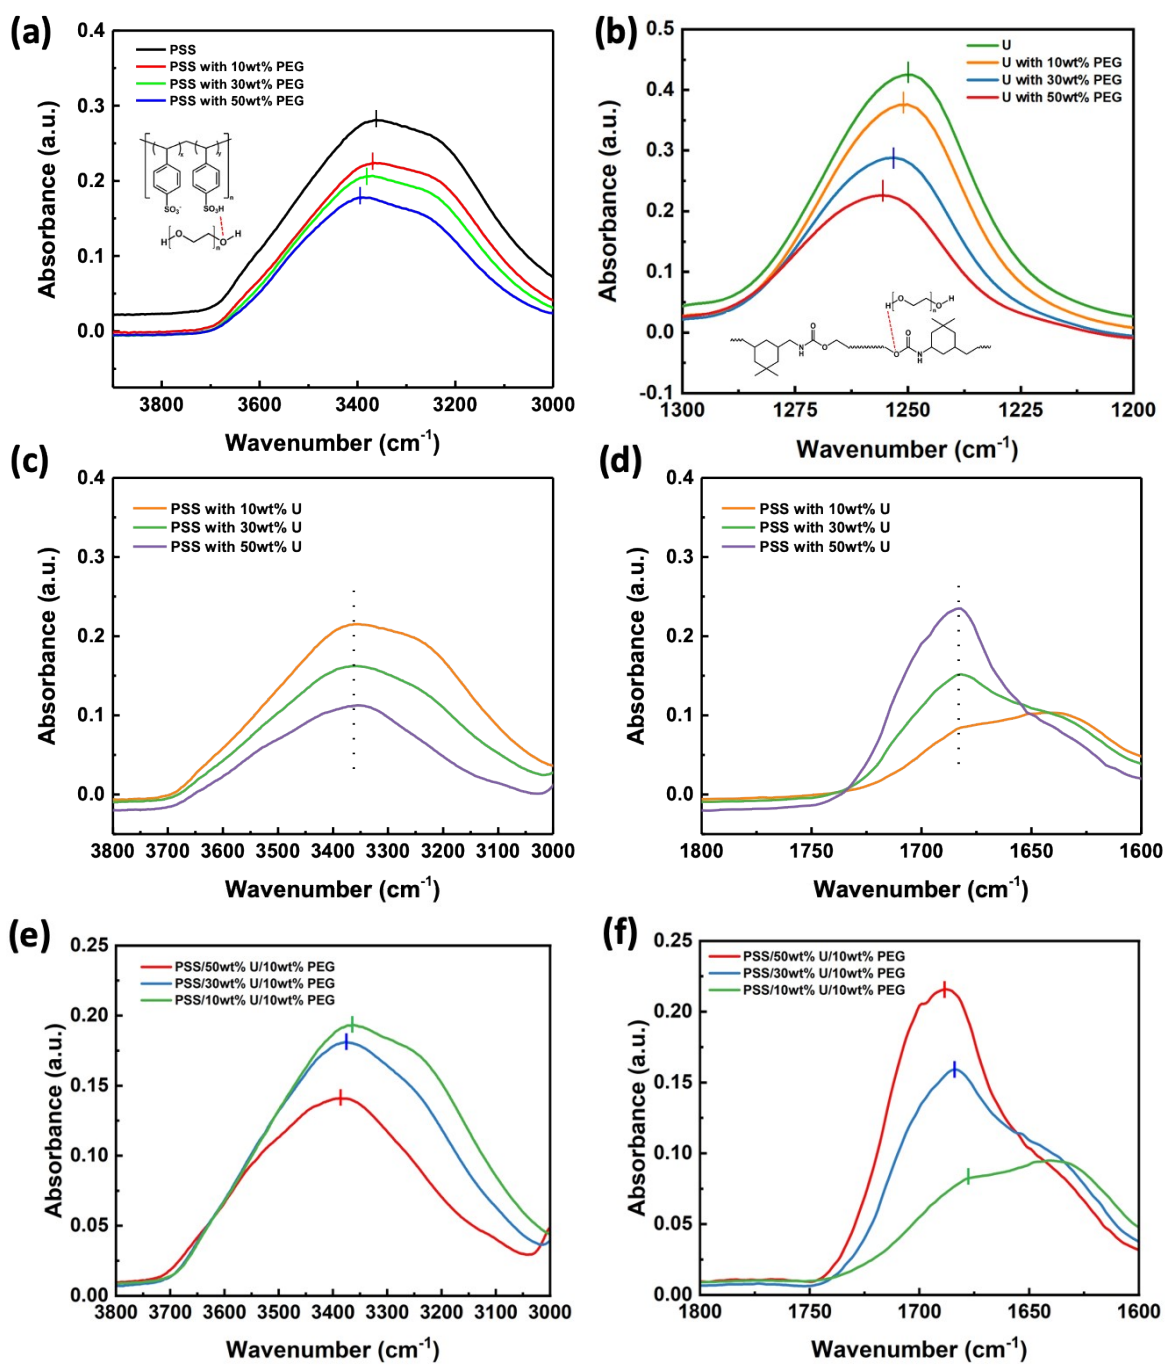

**Figure S2.** FTIR spectra of (a) pristine PSS and mixture of PSS/PEG with different percentages (10%, 30%, 50%). (b) pristine urethane (U) and U/PEG with different percentages (10%, 30%, 50%). (c), (d) PSS/U with different percentages (10%, 30%, 50%). (e), (f) PSS/U/PEG with different percentages (10%, 30%, 50%) of U and a fixed 10% of PEG.

**Table S1.** The FTIR peaks of SO<sub>3</sub>-H and S=O bands in PSS and C-O-C and C=O bands in U.

| Samples               | SO <sub>3</sub> -H in PSS<br>(cm <sup>-1</sup> ) | S=O in PSS<br>(cm <sup>-1</sup> ) | C-O-C in U<br>(cm <sup>-1</sup> ) | C=O in U<br>(cm <sup>-1</sup> ) |
|-----------------------|--------------------------------------------------|-----------------------------------|-----------------------------------|---------------------------------|
| PSS                   | 3360.1                                           | 1172.8                            | -                                 | -                               |
| PSS/10wt% PEG         | 3369.4                                           | 1176.8                            | -                                 | -                               |
| PSS/30wt% PEG         | 3381.1                                           | 1180.4                            | -                                 | -                               |
| PSS/50wt% PEG         | 3394.6                                           | 1186.0                            | -                                 | -                               |
| U                     | -                                                | -                                 | 1250.1                            | 1690.0                          |
| U/10wt% PEG           | -                                                | -                                 | 1251.3                            | 1692.1                          |
| U/30wt% PEG           | -                                                | -                                 | 1253.2                            | 1695.0                          |
| U/50wt% PEG           | -                                                | -                                 | 1255.8                            | 1697.6                          |
| PSS/10wt% U           |                                                  |                                   |                                   |                                 |
| PSS/30wt% U           | 3362.6                                           | -                                 | -                                 | 1683.3                          |
| PSS/50wt% U           |                                                  |                                   |                                   |                                 |
| PSS/10wt% U/10wt% PEG | 3366.6                                           | -                                 | -                                 | 1678.3                          |
| PSS/30wt% U/10wt% PEG | 3376.8                                           | -                                 | -                                 | 1683.9                          |
| PSS/50wt% U/10wt% PEG | 3381.4                                           | -                                 | -                                 | 1688.0                          |

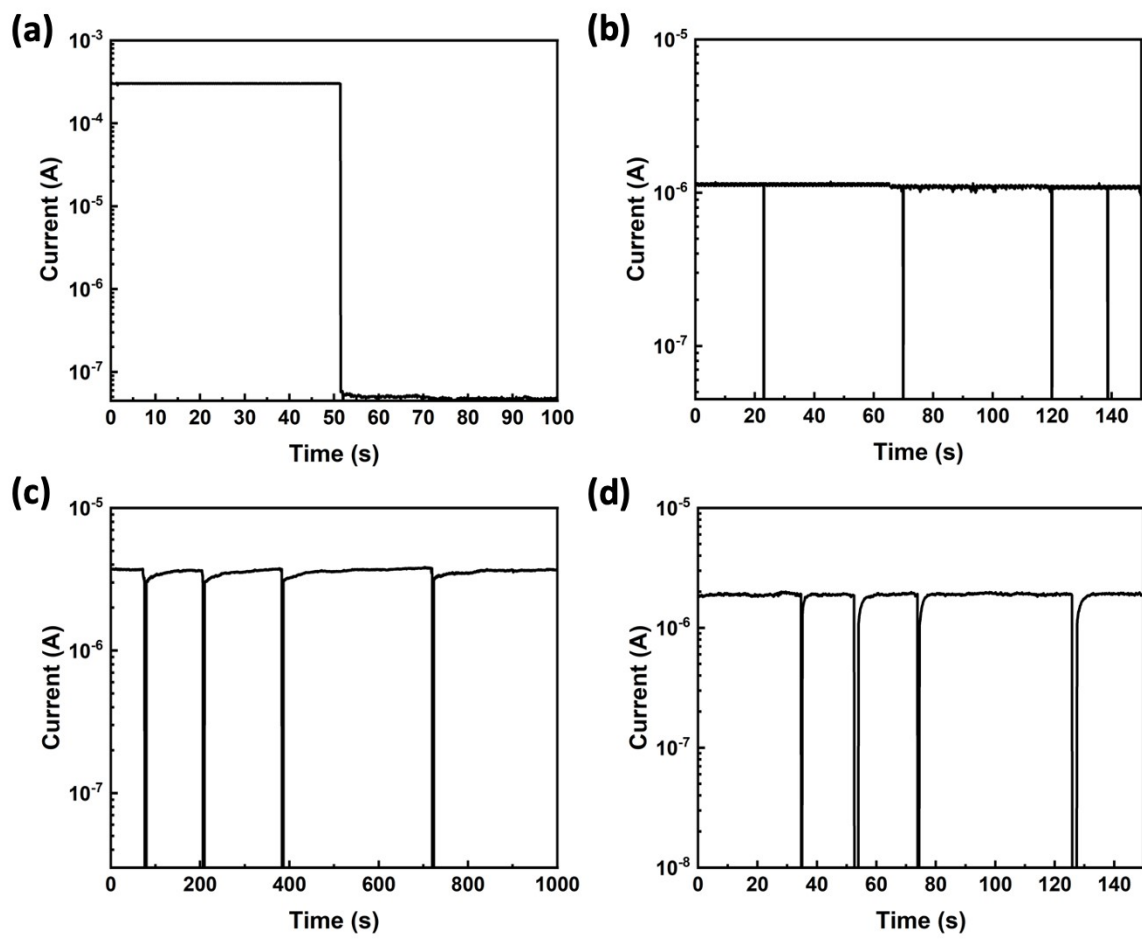

**Figure S3.** Current vs. time plot for (a) PEDOT:PSS, (b) PEDOT:PSS/PU, (c) PEDOT:PSS/PU/Glycerol, and (d) PEDOT:PSS/PEG/Glycerol films during several cut/healing processes.

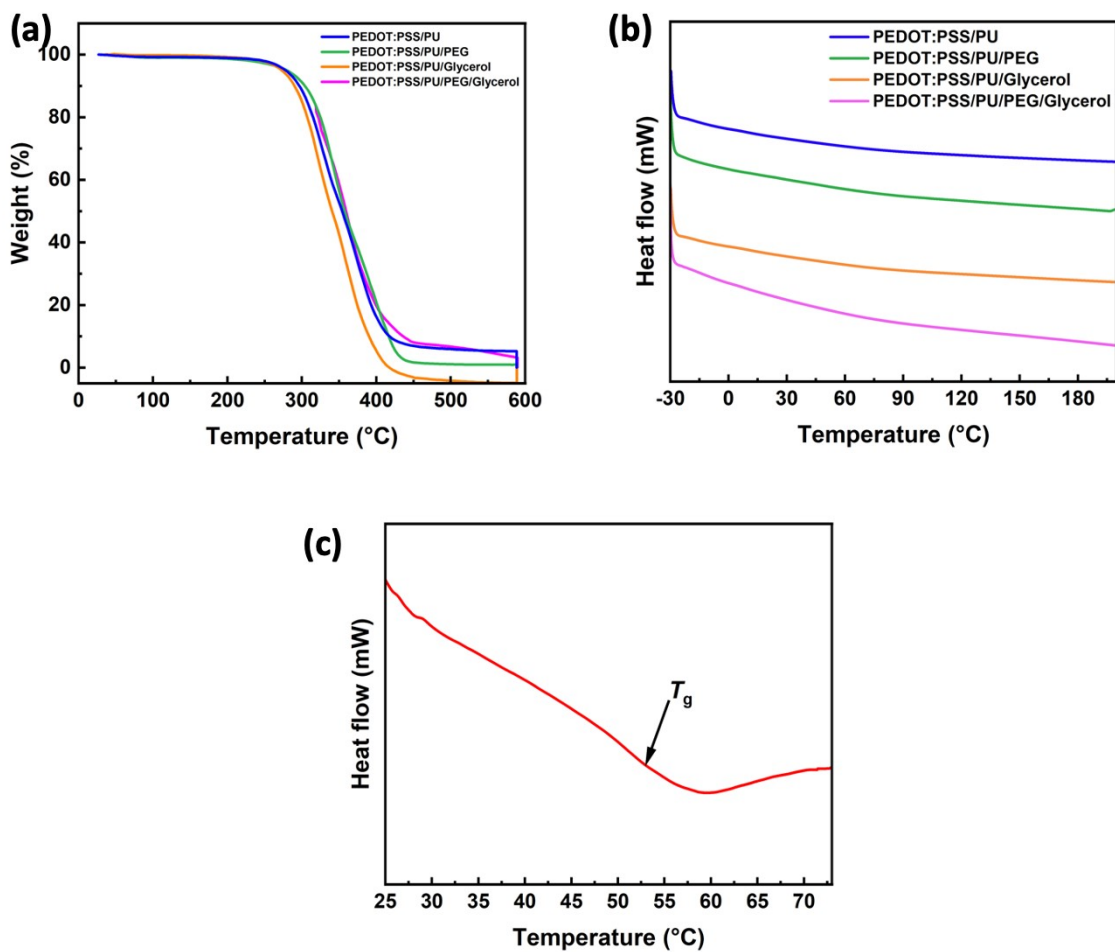

**Figure S4.** (a) TGA and (b) DSC thermograms of PEDOT:PSS/PU (blue), PEDOT:PSS/PU/PEG (green), PEDOT:PSS/PU/Glycerol (orange), and PEDOT:PSS/PU/PEG/Glycerol (magenta) films. (c) DSC in modulated mode thermograms of PU with glass transition temperature ( $T_g$ ) at  $\sim 53$  °C.

We investigated the mechanical self-healing properties of PEDOT:PSS/PU/Glycerol and PEDOT:PSS/PU/PEG/Glycerol. Notably, the PEDOT:PSS/PU/PEG/Glycerol film exhibited partial scratch recovery (**Fig. S5d**), while the PEDOT:PSS/PU/Glycerol film ruptured under a 5N applied force (**Fig. S5c**) and showed no recovery under a 3N force scratch (**Fig. S5e**). A healing efficiency of 55% was obtained for PEDOT:PSS/PU/PEG/Glycerol films (**Fig. S6b**). The branched molecular structure of glycerol is identified as a potential cause for the observed decline in both the self-healing and mechanical properties, acting as a plasticizer and disrupting hydrogen bonding in the linearly structured PEG, PU, and PEDOT:PSS in the polymeric blends.

For the cut-stick self-healing tests, tensile stress-strain curves obtained from intact and healed PEDOT:PSS/PU/PEG/Glycerol demonstrated similar recovery in stretchability (**Fig. S8a**) and slightly reduced healing efficiency (**Fig. S8b**).

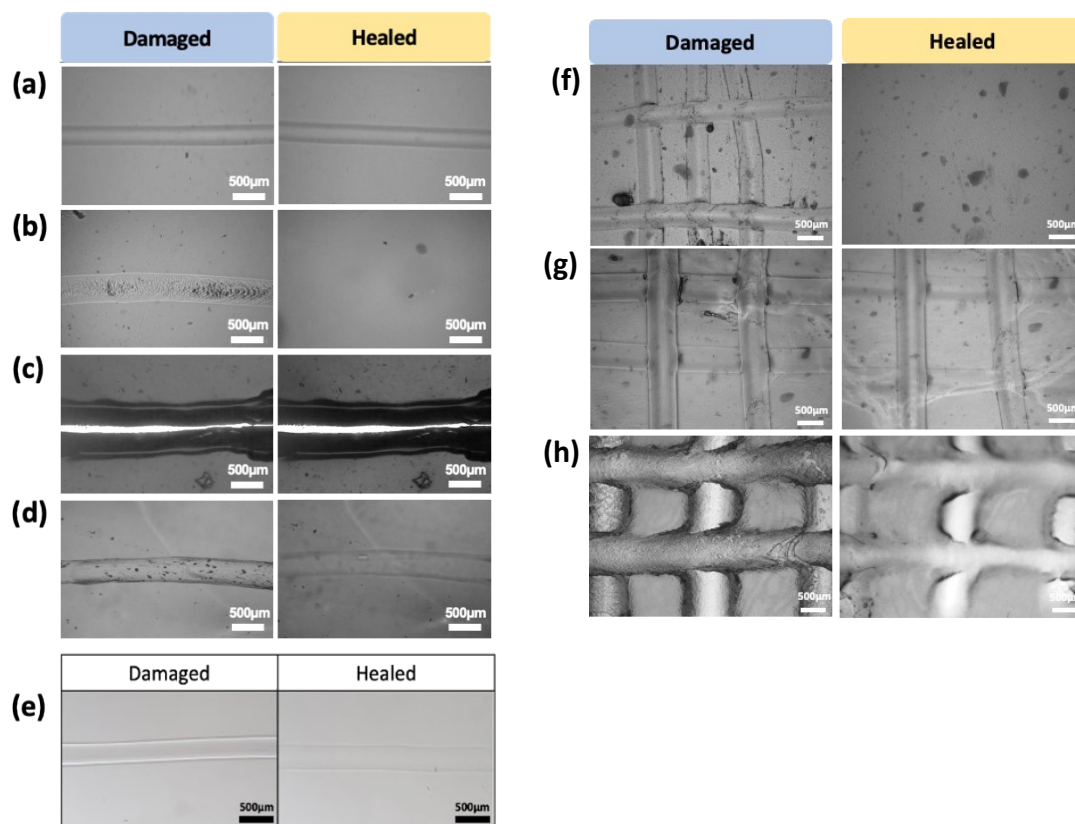

**Figure S5.** Optical microscope images of (a) PEDOT:PSS, (b) PEDOT:PSS/PU, (c) PEDOT:PSS/PU/Glycerol, and (d) PEDOT:PSS/PU/PEG/Glycerol after single scratching with a 5N force on the surface and healing for 10 min at 50 °C. (e) PEDOT:PSS/PU/PEG/Glycerol after surface scratching (3N) and healing for 10 min at 50 °C. (f) PEDOT:PSS/PU, (g) PEDOT:PSS/PU/Glycerol, and (h) PEDOT:PSS/PU/PEG/Glycerol after grid scratching and healing for 10 min at 50 °C.



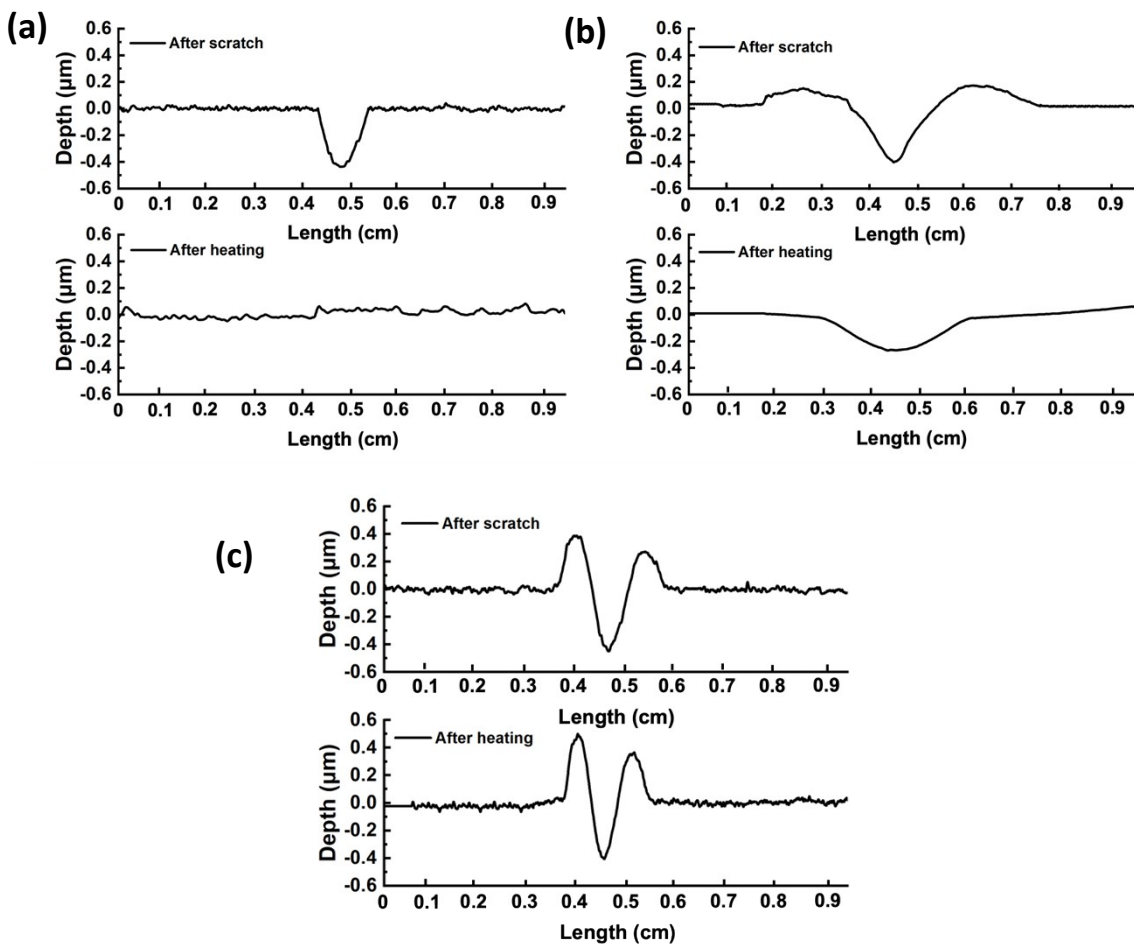

**Figure S6.** Depth profile for (a) PEDOT:PSS/PU, (b) PEDOT:PSS/PU/PEG/Glycerol and (c) PEDOT:PSS films scratched with 5N and heated at 50 °C for 10 min.

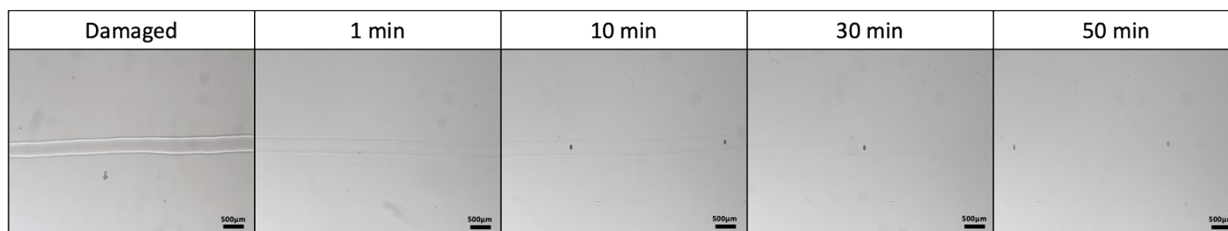

**Figure S7.** Optical microscope images of self-healing PU with surface scratched by 5N force and after healing for 50 min at 60 °C. The average thickness of the film was ~21 μm.

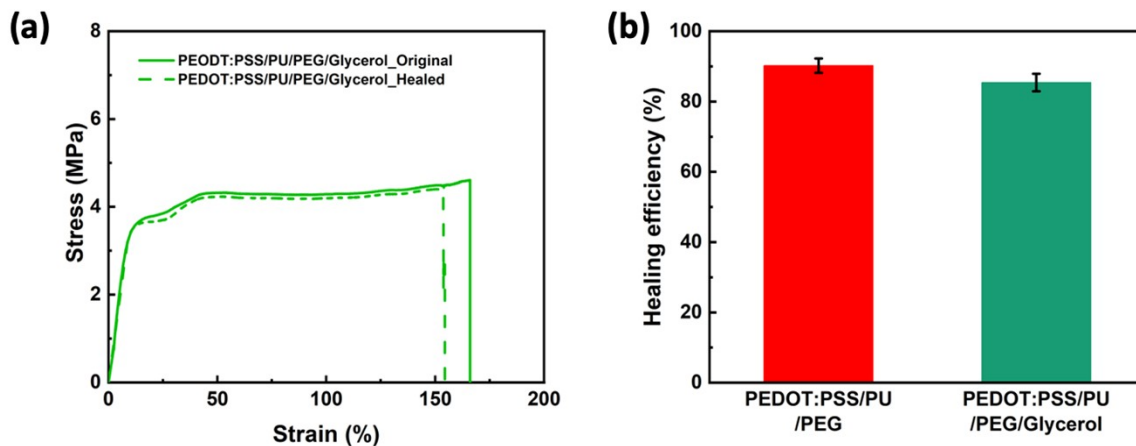

**Figure S8.** (a) Stress-strain curve of original and healed PEDOT:PSS/PU/PEG/Glycerol films. (b) Average healing efficiencies of PEDOT:PSS/PU/PEG and PEDOT:PSS/PU/PEG/Glycerol samples extracted from stress-strain measurements. Data for healing efficiency ( $n = 3$ ) are recorded as mean  $\pm$  standard deviation.

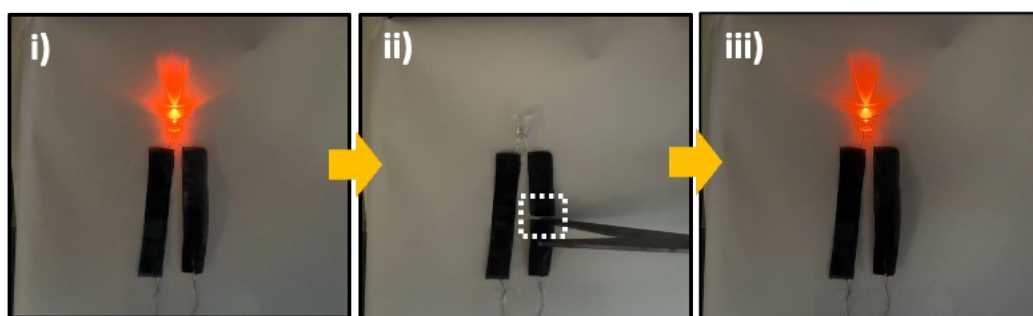

**Figure S9.** Demonstration of the cut and healing effect on a PEDOT:PSS/PU/PEG film connected in a circuit with an LED bulb: (i) Original, (ii) after cut and (iii) after heating at 50 °C. The sample under a constant voltage of 0.2 V.

**Table S2.** Summary of PEDOT:PSS-based films showing recyclable, healing behavior, maximum elongation at break, toughness, mechanical healing efficiency, conductivity, and electrical healing efficiency.

| Materials                    | Recyclable | Healing behavior            | Maximum elongation at break (%) | Toughness (MJ/m <sup>3</sup> ) | Mechanical healing efficiency (%) | Conductivity (S/cm)   | Electrical healing efficiency (%) | Healing response time | Ref.      |
|------------------------------|------------|-----------------------------|---------------------------------|--------------------------------|-----------------------------------|-----------------------|-----------------------------------|-----------------------|-----------|
| PEDOT:PSS/PEG                | No         | Autonomous                  | 6.5                             | -                              | -                                 | 201                   | ≈ 100                             | ≈ 50–800ms            | 1         |
| PEDOT:PSS/Triton X-100       | No         | Autonomous                  | 57                              | -                              | -                                 | 78                    | ≈ 70-100                          | ≈ 1s                  | 2         |
| PEDOT:PSS/Glycerol           | No         | Water-enabled               | 12                              | -                              | -                                 | 500                   | ≈ 100                             | ≈ 150ms               | 3         |
| PEDOT:PSS- <i>b</i> -PPEGMEA | No         | Water-enabled               | 128                             | 3.4                            | -                                 | 0.05                  | ≈ 50                              | ≈ 1s                  | 4         |
| PEDOT:PSS/PAAMPAS/IL         | No         | Autonomous                  | 600                             | -                              | ≈ 85                              | 320                   | ≈ 100                             | ≈ 19ms                | 5         |
|                              |            | Cut-stick                   |                                 |                                |                                   |                       |                                   | ≈ 24h                 |           |
| PANI/PAA                     | No         | Cut-stick                   | 470                             | -                              | ≈ 99                              | 0.1                   | ≈ 99                              | ≈ 24h                 | 6         |
| PEDOT:Tos                    | No         | Water-enabled               | -                               | -                              | -                                 | 1600                  | ≈ 95                              | 0.3s                  | 7         |
| PAAMPSA/PANI/PA              | No         | Autonomous                  | 2000                            | -                              | ≈ 50                              | 200                   | ≈ 98.6                            | 3h                    | 8         |
|                              |            | Cut-stick (Pressure)        |                                 |                                |                                   |                       |                                   |                       |           |
| BCOE/PEGMMA@Li/LFP           | No         | Cut-stick                   | 600                             | -                              | -                                 | 1.9 x10 <sup>-4</sup> | ≈ 100                             | 1h                    | 9         |
| Poly(PDES)-PA                | No         | Cut-stick                   | 1300                            | -                              | ≈ 91.5                            | 7.8x10 <sup>-4</sup>  | ≈ 100                             | 48h                   | 10        |
| PEDOT:PSS/PU/PEG             | Yes        | Autonomous                  | 350                             | 24.6                           | ≈ 90                              | 15.4                  | ≈ 100                             | ≈ 0.1s                | This work |
|                              |            | Cut-stick (heated at 50 °C) |                                 |                                |                                   |                       |                                   | ≈ 5min                |           |

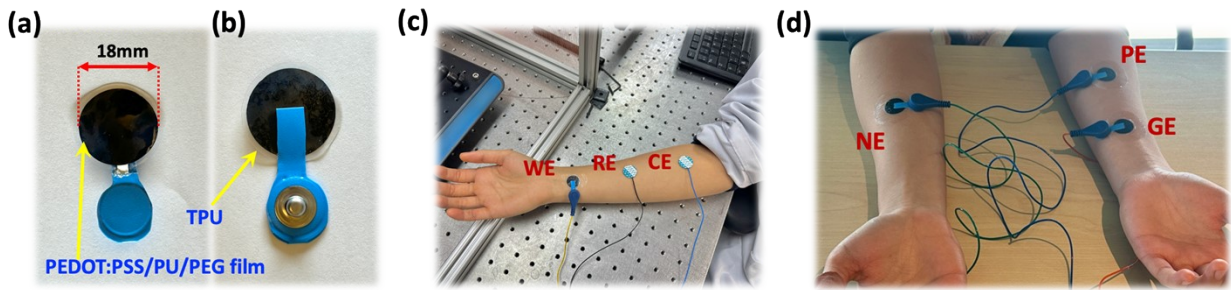

**Figure S10.** Photographs showing the (a) front and (b) back view of the electrodes. (c) Photograph of the skin-electrode impedance and ECG measurement configuration. The PEDOT:PSS/PU/PEG film acted as the working electrode (WE), and commercial Ag/AgCl gel disk electrodes (Natus®) were used as the reference (RE) and counter (CE) electrodes. Measurements were performed with the same volunteer and location on the same day. Data for skin-electrode impedance are reported as mean  $\pm$  standard deviation ( $n = 3$ ). (d) Configuration of ECG measurements in a volunteer. Positive (PE) and ground (GE) electrodes positioned on the left forearm and the negative electrode (NE) was placed on the right forearm.

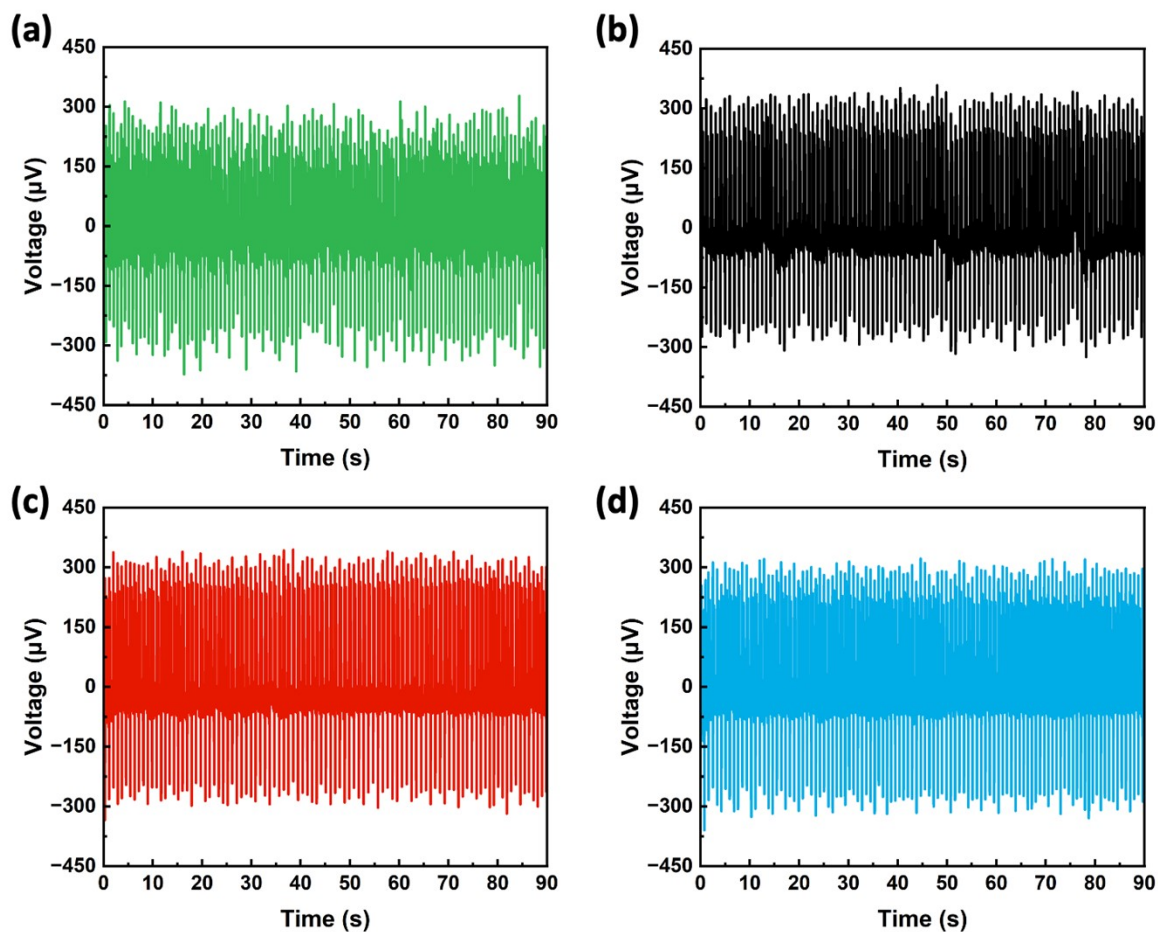

**Figure S11.** ECG signal recording for 90 s with using commercial (a) PEDOT:PSS/PU/PEG film electrodes before (green) and (b) after self-healing (black) and (c) recycling (red) and (d) Natus® Ag/AgCl gel (blue) electrodes.

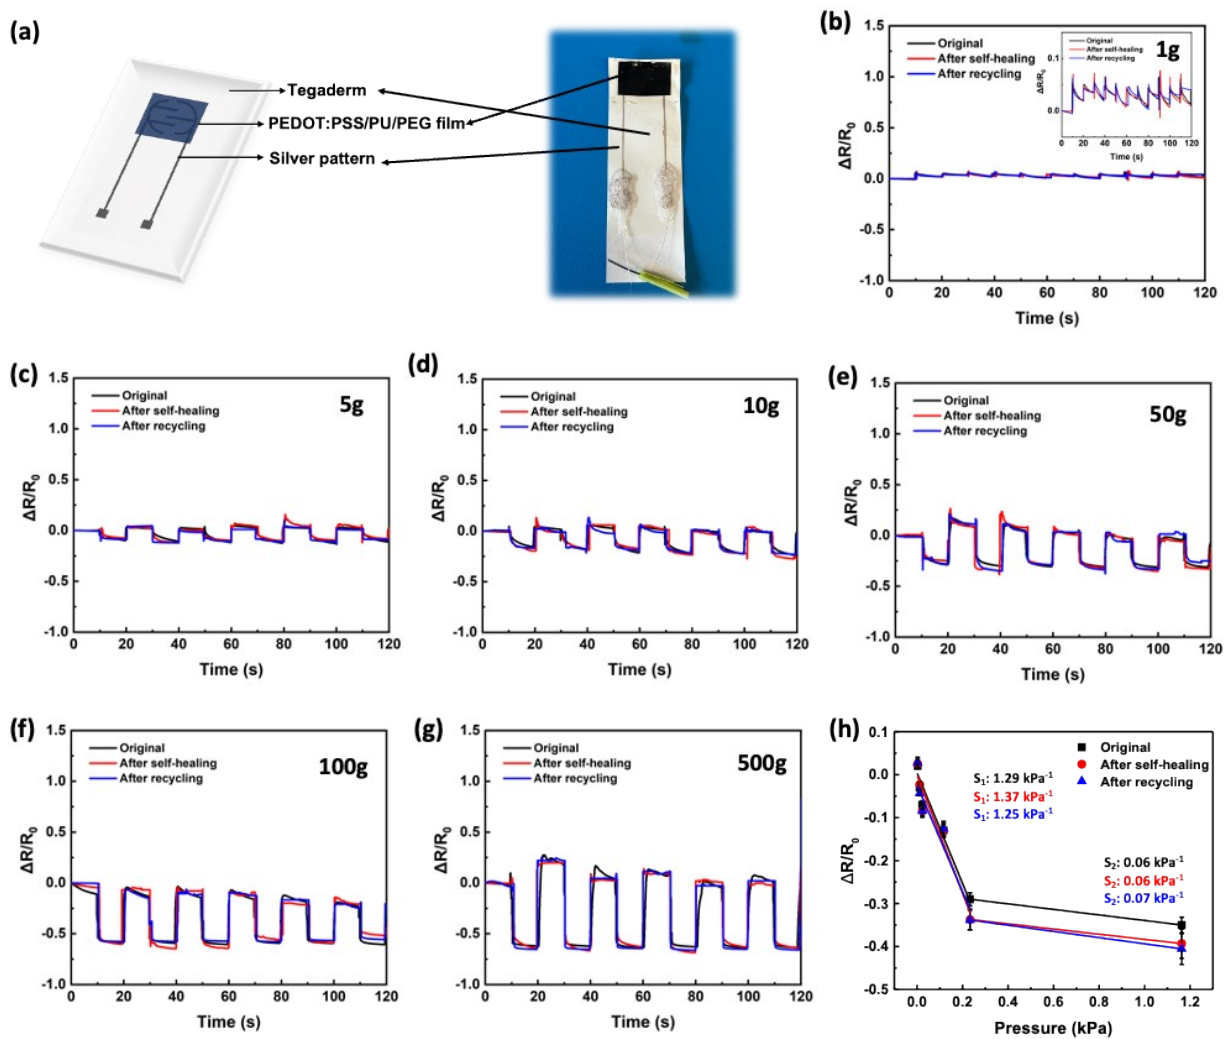

**Figure S12.** (a) Scheme and photo of resistive pressure sensor based on PEDOT:PSS/PU/PEG film (3rd layer) with printed Ag pattern contact (2nd layer) on Tegaderm substrate (1st layer). Real-time resistance change ( $\Delta R/R_0$  vs. time) with repeated application of (b) 1 g, (c) 5 g, (d) 10 g, (e) 50 g, (f) 100 g, (g) 500 g weight on the original (black), self-healing (red), and recycled (blue) PEDOT:PSS/PU/PEG films. The same film was used for all the measurements. (h) Sensitivity curves extracted for the original pressure sensor after self-healing and recycling.

The working principle of our pressure sensor is based on the change of contact resistance at the Ag/PEDOT:PSS/PU/PEG interface upon applying pressure. We observed two pressure sensitivity ranges. For an applied pressure up to 0.2 kPa, two mechanisms contribute to the steep contact resistance reduction: i) new electrical connections formed between Ag and PEDOT:PSS/PU/PEG, and ii) the increased

contact area for the existing electrical contacts. For the higher-pressure range, the lower sensitivity suggests that the change of resistance predominantly depends on the increased contact area.

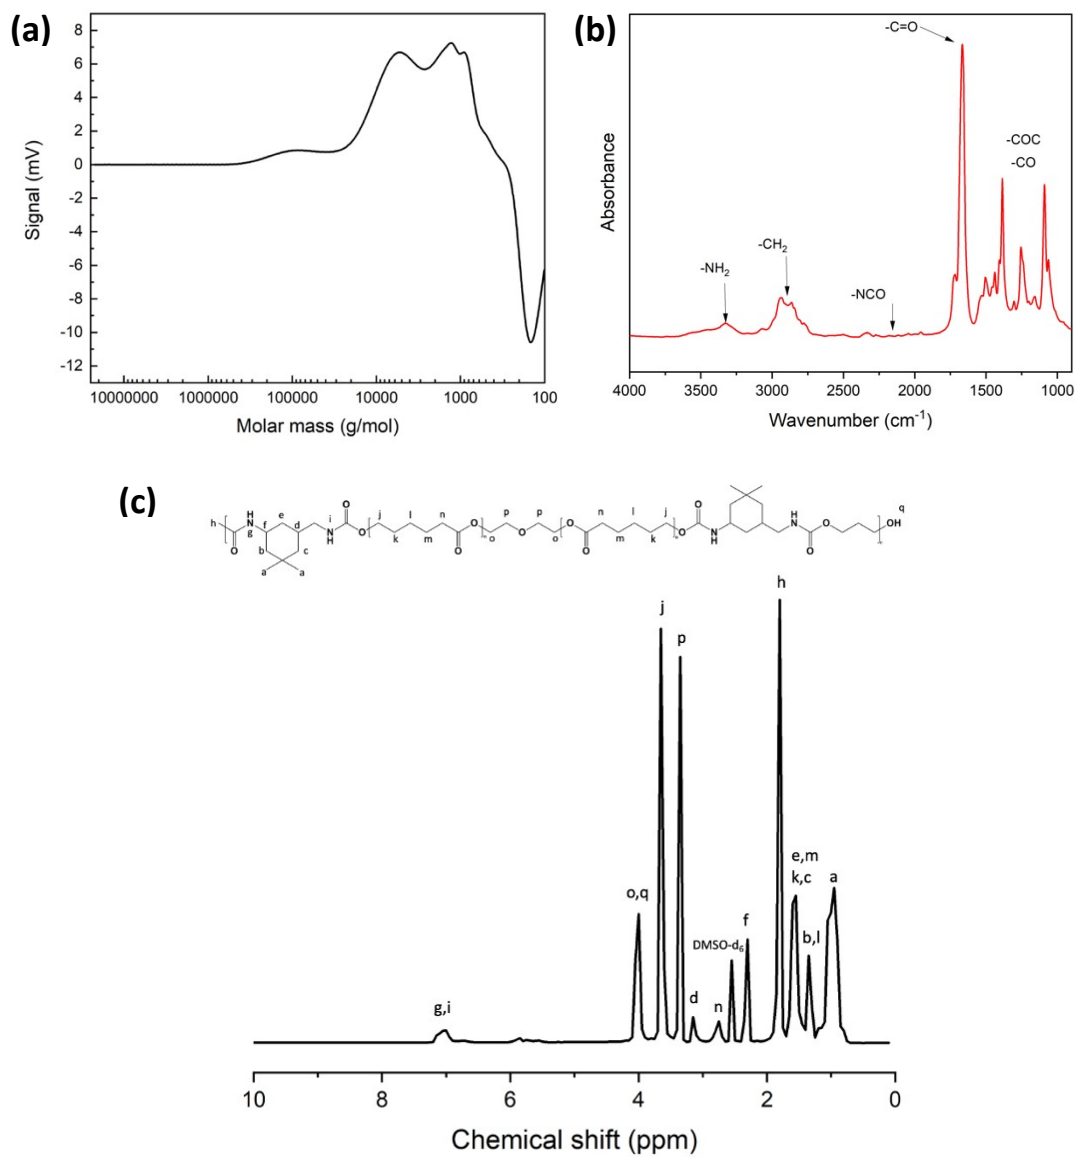

**Figure S13.** (a) GPC, (b) FTIR and (c) <sup>1</sup>H NMR spectra of the self-healing polyurethane synthesized for this work.

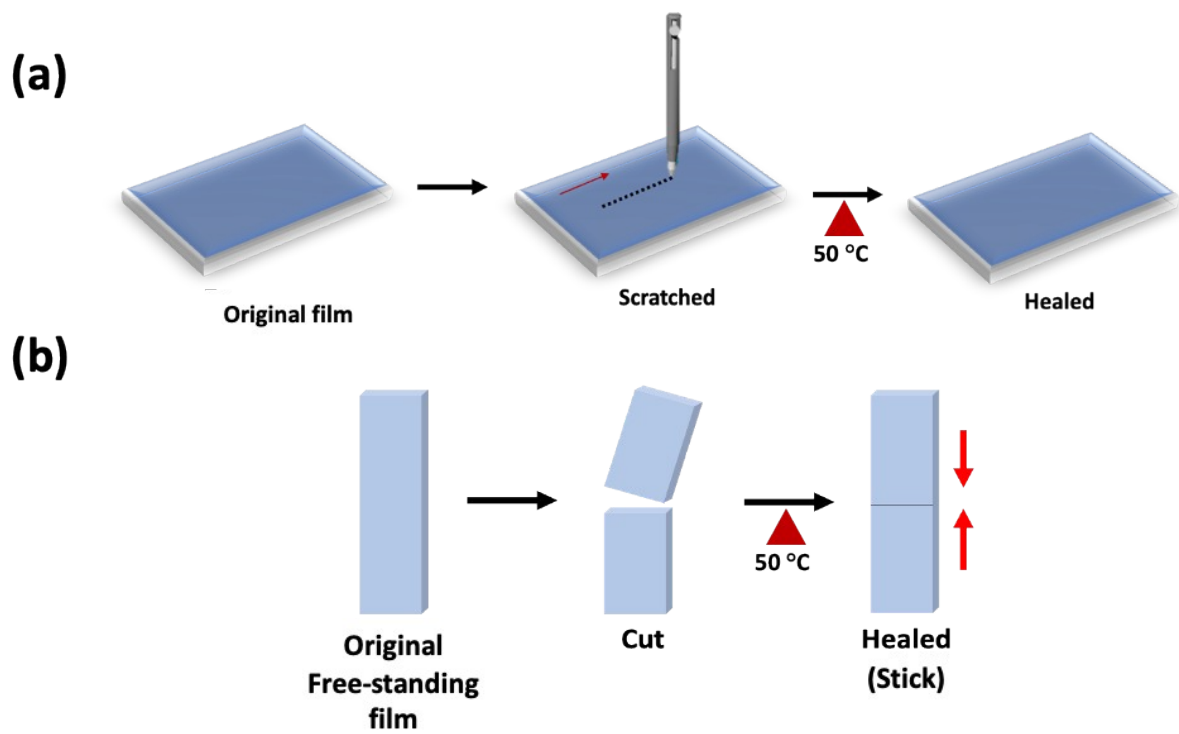

**Figure S14.** Demonstration of mechanical self-healing experiments used in this study: (a) scratch test and (b) cut-stick test.

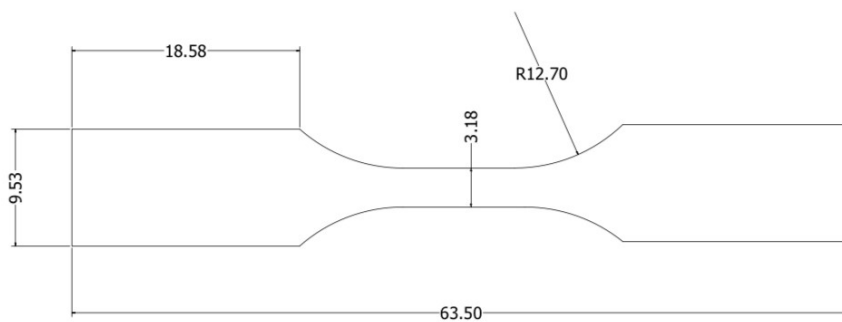

**Figure S15.** Dog bone mold of ASTM D638 type V



## References

1. Y. Li, X. Li, S. Zhang, L. Liu, N. Hamad, S. R. Bobbara, D. Pasini and F. Cicoira, *Advanced Functional Materials*, 2020, **30**, 2002853.
2. J. Y. Oh, S. Kim, H. K. Baik and U. Jeong, *Advanced Materials*, 2016, **28**, 4455-4461.
3. S. Zhang and F. Cicoira, *Advanced Materials*, 2017, **29**, 1703098.
4. L. V. Kayser, M. D. Russell, D. Rodriguez, S. N. Abuhamdieh, C. Dhong, S. Khan, A. N. Stein, J. Ramírez and D. J. Lipomi, *Chem Mater*, 2018, **30**, 4459-4468.
5. X. Q. Su, X. H. Wu, S. Chen, A. M. Nedumaran, M. Stephen, K. Q. Hou, B. Czarny and W. L. Leong, *Advanced Materials*, 2022, **34**, 2200682.
6. T. Wang, Y. Zhang, Q. C. Liu, W. Cheng, X. R. Wang, L. J. Pan, B. X. Xu and H. X. Xu, *Advanced Functional Materials*, 2018, **28**, 1705551.
7. Y. Li, S. M. Zhang, N. Hamad, K. Kim, L. Liu, M. Lerond and F. Cicoira, *Macromol Biosci*, 2020, **20**, 2000146.
8. Y. Lu, Z. Q. Liu, H. M. Yan, Q. Peng, R. G. Wang, M. E. Barkey, J. W. Jeon and E. K. Wujcik, *Acs Applied Materials & Interfaces*, 2019, **11**, 20453-20464.
9. F. Y. Sun, Z. X. Li, S. L. Gao, Y. Y. He, J. C. Luo, X. Zhao, D. D. Yang, T. Gao, H. B. Yang and P. F. Cao, *Acs Applied Materials & Interfaces*, 2022, **14**, 26014-26023.
10. R. Li, T. Fan, G. X. Chen, H. J. Xie, B. Su and M. H. He, *Chem Eng J*, 2020, **393**, 124595.
